# Supplementary material
Source: Elsevier journal article supplement (https://www.sciencedirect.com/science/article/pii/S2173572722002429)
Supplement: mmc1 [file S2173572722002429:mmc1.pdf]

**Supplementary material****Table S1:** Scoring systems of Early Warning Scores.**National Early Warning Score 2 (NEWS2)**

| Physiologic Parameters     | 3     | 2      | 1         | 0                             | 1               | 2               | 3             |
|----------------------------|-------|--------|-----------|-------------------------------|-----------------|-----------------|---------------|
| Respiratory Rate           | <8    |        | 9-11      | 12-20                         |                 | 21-24           | ≥25           |
| SpO <sub>2</sub> Scale (%) | ≤83   | 84-85  | 86-87     | 88-92 on oxygen<br>≥93 on air | 93-94 on oxygen | 95-96 on oxygen | ≥97 on oxygen |
| Air or oxygen              |       | Oxygen |           | Air                           |                 |                 |               |
| Systolic Blood Pressure    | ≤90   | 91-100 | 101-110   | 111-219                       |                 |                 | ≥220          |
| Heart Rate                 | ≤40   |        | 41-50     | 51-90                         | 91-110          | 111-130         | ≥131          |
| Consciousness              |       |        |           | Alert                         |                 |                 | CVPU          |
| Temperature                | ≤35.0 |        | 35.1-36.0 | 36.1-38.0                     | 38.1-39.0       | ≥39.1           |               |

**Modified NEWS proposed by Liao et al. (NEWS-C)**

| Physiologic Parameters     | 3     | 2      | 1         | 0         | 1         | 2       | 3    |
|----------------------------|-------|--------|-----------|-----------|-----------|---------|------|
| Age                        |       |        |           | <65       |           |         | ≥65  |
| Respiratory Rate           | <8    |        | 9-11      | 12-20     |           | 21-24   | ≥25  |
| SpO <sub>2</sub> Scale (%) | ≤91   | 92-93  | 94-95     | ≥96       |           |         |      |
| Air or oxygen?             |       | Oxygen |           | Air       |           |         |      |
| Systolic Blood Pressure    | ≤90   | 91-100 | 101-110   | 111-219   |           |         | ≥220 |
| Heart Rate                 | ≤40   |        | 41-50     | 51-90     | 91-110    | 111-130 | ≥131 |
| Consciousness              |       |        |           | Alert     |           |         | CVPU |
| Temperature                | ≤35.0 |        | 35.1-36.0 | 36.1-38.0 | 38.1-39.0 | ≥39.1   |      |

**COVID-19 Severity Index**

| Physiologic Parameters     | 3  | 2 | 1                     | 0                             | 1                     | 2     | 3   |
|----------------------------|----|---|-----------------------|-------------------------------|-----------------------|-------|-----|
| Age                        |    |   |                       | <65                           |                       |       | ≥65 |
| Male sex                   |    |   | Yes                   | No                            | Yes                   |       |     |
| Heart failure              |    |   | Yes                   | No                            | Yes                   |       |     |
| COPD                       |    |   | Yes                   | No                            | Yes                   |       |     |
| Diabetes with organ damage |    |   | Yes                   | No                            | Yes                   |       |     |
| Chest X-ray                |    |   | Bilateral infiltrates | Without bilateral infiltrates | Bilateral infiltrates |       |     |
| Respiratory Rate           | <8 |   | 9-11                  | 12-20                         |                       | 21-24 | ≥25 |

|                                 |        |        |           |           |           |         |        |
|---------------------------------|--------|--------|-----------|-----------|-----------|---------|--------|
| SpO <sub>2</sub> Scale (%)      | ≤91    | 92-93  | 94-95     | ≥96       |           |         |        |
| Air or oxygen?                  | Oxygen |        |           | Air       |           |         | Oxygen |
| Systolic Blood Pressure         | ≤90    | 91-100 | 101-110   | 111-219   |           |         | ≥220   |
| Heart Rate                      | ≤40    |        | 41-50     | 51-90     | 91-110    | 111-130 | ≥131   |
| Consciousness                   |        |        |           | Alert     |           |         | CVPU   |
| Temperature                     | ≤35.0  |        | 35.1-36.0 | 36.1-38.0 | 38.1-39.0 | ≥39.1   |        |
| Dyspnea                         |        | Yes    |           | No        |           | Yes     |        |
| D-Dimer (ng/ml)                 |        |        |           | ≤1000     | >1000     |         |        |
| Lymphocytes per mm <sup>3</sup> |        | ≤500   | <1000     | ≥1000     |           |         |        |
| Platelets per mm <sup>3</sup>   |        |        | <100000   | ≥100000   |           |         |        |

The Early Warning Scores were calculated by adding the individual assigned points together. A = alert; CVPU: new Confusion, Voice, Pain, Unresponsive; COPD: Chronic obstructive pulmonary disease.

Note:

- New confusion: A patient may be alert but confused or disoriented. It is not always possible to determine whether the confusion is "new" when a patient presents acutely ill. Such a presentation should always be considered to be "new" until confirmed to be otherwise. New-onset or worsening confusion, delirium or any other altered mentation should always prompt concern about potentially serious underlying causes and warrants urgent clinical evaluation.
- Voice: The patient makes some kind of response when you talk to them, which could be in any of the three component measures of eyes, voice or motor -- eg patient's eyes open on being asked "Are you okay?". The response could be as little as a grunt, moan, or slight movement of a limb when prompted by voice.
- Pain: The patient makes a response to a pain stimulus. A patient who is not alert and who has not responded to voice (hence having the test performed on them) is likely to exhibit only withdrawal from pain, or even involuntary flexion or extension of the limbs from the pain stimulus. The person undertaking the assessment should always exercise care and be suitably trained when using a pain stimulus as a method of assessing levels of consciousness.
- Unresponsive: This is also commonly referred to as "unconscious". This outcome is recorded if the patient does not give any eye, voice or motor response to voice or pain.

**Table S2:** Sensibility, specificity, likelihood ratios of the three scores

| NEWS2                   | Proportion of classified patients | Sensitivity | Specificity | LR+  | LR-  |
|-------------------------|-----------------------------------|-------------|-------------|------|------|
| 0                       | 32.19%                            | 100.00%     | 0.00%       | 1.00 |      |
| 1                       | 62.19%                            | 80.00%      | 33.47%      | 1.20 | 0.60 |
| 2                       | 80.41%                            | 64.80%      | 65.02%      | 1.85 | 0.54 |
| 3                       | 91.50%                            | 48.00%      | 83.39%      | 2.89 | 0.62 |
| 4                       | 96.36%                            | 29.60%      | 93.71%      | 4.70 | 0.75 |
| 5                       | 98.56%                            | 14.40%      | 97.48%      | 5.72 | 0.88 |
| 6                       | 99.77%                            | 5.60%       | 98.99%      | 5.56 | 0.95 |
| ≥7                      | 100%                              | 0.80%       | 99.83%      | 4.77 | 0.99 |
| NEWS-C                  |                                   |             |             |      |      |
| 0                       | 22.02%                            | 100.00%     | 0.00%       | 1.00 |      |
| 1                       | 49.58%                            | 92.80%      | 23.57%      | 1.21 | 0.31 |
| 2                       | 72.97%                            | 73.60%      | 52.01%      | 1.53 | 0.51 |
| 3                       | 86.64%                            | 55.20%      | 75.92%      | 2.29 | 0.59 |
| 4                       | 93.85%                            | 39.20%      | 89.35%      | 3.68 | 0.68 |
| 5                       | 97.42%                            | 24.80%      | 95.81%      | 5.91 | 0.78 |
| 6                       | 99.24%                            | 8.80%       | 98.07%      | 4.56 | 0.93 |
| ≥7                      | 100%                              | 3.20%       | 99.50%      | 6.36 | 0.97 |
| COVID-19 Severity Index |                                   |             |             |      |      |
| 0                       | 0.53%                             | 100.00%     | 0.00%       | 1.00 |      |
| 1                       | 14.64%                            | 99.21%      | 0.50%       | 1.00 | 1.58 |
| 2                       | 31.79%                            | 97.62%      | 15.94%      | 1.16 | 0.15 |
| 3                       | 46.05%                            | 95.24%      | 34.65%      | 1.46 | 0.14 |
| 4                       | 63.58%                            | 84.92%      | 49.33%      | 1.68 | 0.31 |
| 5                       | 75.49%                            | 69.05%      | 67.03%      | 2.09 | 0.46 |
| 6                       | 84.45%                            | 56.35%      | 78.86%      | 2.67 | 0.55 |
| 7                       | 90.36%                            | 45.24%      | 87.58%      | 3.64 | 0.63 |
| 8                       | 94.08%                            | 34.92%      | 93.04%      | 5.02 | 0.70 |
| 9                       | 96.66%                            | 23.81%      | 95.97%      | 5.91 | 0.79 |

|     |        |        |        |       |      |
|-----|--------|--------|--------|-------|------|
| 10  | 98.25% | 14.29% | 97.82% | 6.55  | 0.88 |
| 11  | 99.39% | 10.32% | 99.16% | 12.30 | 0.90 |
| ≥12 | 100%   | 3.97%  | 99.75% | 15.77 | 0.96 |

LR: Likelihood ratio.
